# Supplementary material
Source: publisher figshare collection journal article supplement (https://acs.figshare.com/ndownloader/files/5758236)
Supplement: Supplementary file 1 [file 5758236]

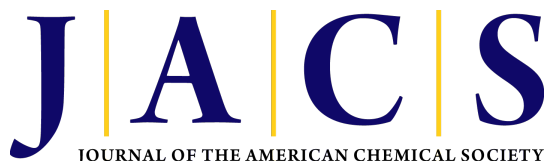

JOURNAL OF THE AMERICAN CHEMICAL SOCIETY

J. Am. Chem. Soc., 1998, 120(13), 3243-3244, DOI:[10.1021/ja973926o](https://doi.org/10.1021/ja973926o)

#### Terms & Conditions

Electronic Supporting Information files are available without a subscription to ACS Web Editions. The American Chemical Society holds a copyright ownership interest in any copyrightable Supporting Information. Files available from the ACS website may be downloaded for personal use only. Users are not otherwise permitted to reproduce, republish, redistribute, or sell any Supporting Information from the ACS website, either in whole or in part, in either machine-readable form or any other form without permission from the American Chemical Society. For permission to reproduce, republish and redistribute this material, requesters must process their own requests via the RightsLink permission system. Information about how to use the RightsLink permission system can be found at <http://pubs.acs.org/page/copyright/permissions.html>

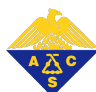

ACS Publications

MOST TRUSTED. MOST CITED. MOST READ.

Copyright © 1998 American Chemical Society

## Experimental Section

### General

Solvents were dried by standard procedures. IR spectra were recorded on a Bio-Rad FTS-40 spectrophotometer. The NMR spectra were recorded on Bruker AC-E200, Bruker ACE-300, or a Varian Unity 400 plus spectrometer. For the  $^{31}\text{P}$  NMR spectra, the spectrometer frequency at 81.015, 121.496, or 161.897 MHz was employed, respectively, and chemical shifts are given in ppm ( $\delta$ ) relative to 85%  $\text{H}_3\text{PO}_4$  in  $\text{CDCl}_3$ . Values upfield of the standard are defined as negative. Mass spectrometric analyses were collected on a JEOL SX-102A spectrometer. Elemental analyses were done on a Perkin-Elmer 2400 CHN analyzer.

### Synthesis and Characterization

**{Pt(PPh<sub>3</sub>)<sub>2</sub>[ $\eta^3$ -CH<sub>2</sub>C(2-pyrrolyl)CH<sub>2</sub>]}(BF<sub>4</sub>) (2a).** A two-necked round-bottomed flask was charged with [Pt(PPh<sub>3</sub>)<sub>2</sub>( $\eta^3$ -C<sub>3</sub>H<sub>3</sub>)](BF<sub>4</sub>) (51 mg, 0.059 mmol) and dry  $\text{CDCl}_3$  (1 mL). Pyrrole (4  $\mu\text{L}$ , 0.6 mmol) was injected into solution at 25 °C. The reaction solution was stirred in nitrogen atmosphere for 20 h. The conversion to **2a** was over 90% based on the NMR data.  $^{31}\text{P}$  NMR ( $\text{CDCl}_3$ , 121.5 MHz)  $\delta$  18.1 ( $J_{\text{P-Pt}} = 3757$  Hz);  $^1\text{H}$  NMR ( $\text{CDCl}_3$ , 300 MHz)  $\delta$  2.68 (2H, dd,  $J_{\text{H-H}} = 3.0$  Hz,  $J_{\text{H-P}} = 7.0$  Hz,  $J_{\text{H-Pt}} = 45$  Hz, anti-H), 3.74 (2H, br, syn-H), 6.0 (1H, br, 3-H<sub>py</sub>), 6.2 (1H, br, 4-H<sub>py</sub>), 7.1-7.7 (31H, m, phenyl H & 5-H<sub>py</sub>), 9.95 (1H, br, NH);  $^{13}\text{C}$  NMR ( $\text{CDCl}_3$ , 200 MHz)  $\delta$  58.6 (dd,  $J_{\text{C-P}} = 3.8, 35.9$  Hz,  $J_{\text{C-Pt}} = 106$  Hz, C<sub>t</sub>), 110.5 ( $J_{\text{C-Pt}} = 12.1$  Hz, 4-C<sub>py</sub>), 112.2 ( $J_{\text{C-Pt}} = 23.8$  Hz, 3-C<sub>py</sub>), 125.6 (s,  $J_{\text{C-Pt}} = 16$  Hz, 5-C<sub>py</sub>), 126.0 ( $J_{\text{C-Pt}} = 38$  Hz, C<sub>c</sub>), 128.2 (s, 2-C<sub>py</sub>), 128.6-133.6 (phenyl C).

**{Pt(PPh<sub>3</sub>)<sub>2</sub>[ $\eta^3$ -CH<sub>2</sub>C(2-N-methylpyrrolyl)CH<sub>2</sub>]}(BF<sub>4</sub>) (2b).**

[Pt-(PPh<sub>3</sub>)<sub>2</sub>( $\eta^3$ -C<sub>3</sub>H<sub>3</sub>)](BF<sub>4</sub>) was prepared in situ with equimolar amount of *trans*-Pt(Br)(PPh<sub>3</sub>)<sub>2</sub>( $\eta^1$ -CHCCH<sub>2</sub>) (302 mg, 0.358 mmol) and AgBF<sub>4</sub> (70 mg, 0.358 mmol) in  $\text{CH}_2\text{Cl}_2$  at -20 °C. After filtering off AgBr precipitate,

N-methylpyrrole (30  $\mu$ L) was charged and the reaction was allowed to last for 3 h at 25 °C. Adding diethyl ether to the concentrated reaction solution gave the product in 81% yield.  $^{31}\text{P}$  NMR ( $\text{CDCl}_3$ , 121.5 MHz)  $\delta$  18.2 ( $J_{\text{P-Pt}} = 3823$  Hz);  $^1\text{H}$  NMR ( $\text{CDCl}_3$ , 300 MHz)  $\delta$  3.18 (2H, d,  $J_{\text{H-P}} = 9.0$  Hz,  $J_{\text{H-Pt}} = 41.5$  Hz, anti-H), 3.42 (3H, s,  $\text{NCH}_3$ ), 3.55 (2H, br, syn-H), 6.07 (1H, dd,  $J_{\text{H-H}} = 2.0, 3.9$  Hz,  $J_{\text{H-Pt}} = 11$  Hz, 4- $\text{H}_{\text{py}}$ ), 6.19 (1H, dd,  $J_{\text{H-H}} = 2.6, 3.9$  Hz, 3- $\text{H}_{\text{py}}$ ), 6.78 (1H, dd,  $J_{\text{H-H}} = 2.0, 2.6$  Hz,  $J_{\text{H-Pt}} = 10.3$  Hz, 5- $\text{H}_{\text{py}}$ ), 7.1-7.7 (30H, m, phenyl H);  $^{13}\text{C}$  NMR ( $\text{CDCl}_3$ , 50.3 MHz)  $\delta$  36.3 (s,  $\text{NCH}_3$ ), 63.1 (dd,  $J_{\text{C-P}} = 3.3, 34.5$  Hz,  $J_{\text{C-Pt}} = 100.4$  Hz,  $\text{C}_t$ ), 109.0 ( $J_{\text{C-Pt}} = 10.1$  Hz, 4- $\text{C}_{\text{py}}$ ), 113.8 ( $J_{\text{C-Pt}} = 28$  Hz, 3- $\text{C}_{\text{py}}$ ), 127.5-133.8 (phenyl C,  $\text{C}_c$ , and 2- $\text{C}_{\text{py}}$ ). Anal. Calcd for  $\text{PtC}_{44}\text{H}_{40}\text{NP}_2\text{BF}_4$ : C, 57.03; H, 4.35; N, 1.51. Found : C, 56.30; H, 4.21; N, 1.19.

**{Pt(PPh<sub>3</sub>)<sub>2</sub>[ $\eta^3$ -CH<sub>2</sub>C(3-indolyl)CH<sub>2</sub>]}(BF<sub>4</sub>) (3a).** Refer to the preparation of **2b**. Complex **1** was prepared from *trans*-Pt(Br)(PPh<sub>3</sub>)<sub>2</sub>( $\eta^1$ -CHCCH<sub>2</sub>) (300 mg, 0.358 mmol) and AgBF<sub>4</sub> (78 mg, 0.401 mmol) and was allowed to react with indole (420 mg, 3.59 mmol) in CH<sub>2</sub>Cl<sub>2</sub> at 25 °C for 7 h. The isolated yield was 286 mg (83%).  $^{31}\text{P}$  NMR ( $\text{CDCl}_3$ , 121.5 MHz)  $\delta$  18.8 ( $J_{\text{P-Pt}} = 3803$  Hz);  $^1\text{H}$  NMR ( $\text{CDCl}_3$ , 300 MHz)  $\delta$  2.85 (2H, dd,  $J_{\text{H-H}} = 1.2$  Hz,  $J_{\text{H-P}} = 9.4$  Hz,  $J_{\text{H-Pt}} = 44.2$  Hz, anti-H), 3.89 (2H, br, syn-H), 6.84-7.71 (35H, phenyl & indolyl H), 10.50 (1H, s,  $\text{NH}$ );  $^{13}\text{C}$  NMR ( $\text{CDCl}_3$ , 100.6 MHz)  $\delta$  61.1 (d,  $J_{\text{C-P}} = 31.9$  Hz,  $\text{C}_t$ ), 110.7, 113.5, 119.0, 121.1, 122.8, 124.2, 129.0, 137.4 ( $\text{C}_{\text{indolyl}}$ ), 132 ( $\text{C}_c$ ), 128-134 (phenyl C); MS (FAB,  $m/z$ ): 876 ( $\text{M}^+ - \text{BF}_4$ ). Anal. Calcd for  $\text{PtC}_{47}\text{H}_{40}\text{NP}_2\text{BF}_4$ : C, 58.56; H, 4.19; N, 1.45. Found : C, 57.70; H, 4.28; N, 1.45.

**{Pt(PPh<sub>3</sub>)<sub>2</sub>[ $\eta^3$ -CH<sub>2</sub>C(2-(3-methylindolyl))CH<sub>2</sub>]}(BF<sub>4</sub>) (3b).** Refer to the preparation of **3a**. Complex **1** prepared from *trans*-Pt(Br)(PPh<sub>3</sub>)<sub>2</sub>( $\eta^1$ -CHCCH<sub>2</sub>) (300 mg, 0.358 mmol) and AgBF<sub>4</sub> (78 mg, 0.401 mmol) reacted with 3-methylindole (920 mg, 7.02 mmol) in CH<sub>2</sub>Cl<sub>2</sub> (15 mL) at 5 °C for 12 h gave **3b** in 78% yield (273 mg).  $^{31}\text{P}$  NMR ( $\text{CDCl}_3$ , 121.5 MHz)  $\delta$  17.9 ( $J_{\text{P-Pt}}$

= 3835 Hz);  $^1\text{H}$  NMR ( $\text{CDCl}_3$ , 300 MHz)  $\delta$  2.08 (3H, Me), 3.94 (2H, br, syn-H), 3.17 (2H, d,  $J_{\text{H-H}}$  unresolved,  $J_{\text{H-P}} = 9.0$  Hz,  $J_{\text{H-Pt}} = 40.8$  Hz, anti-H), 7.0-7.5 (34H, m, phenyl & indolyl H), 8.58 (1H, s,  $\text{NH}$ );  $^{13}\text{C}$  NMR ( $\text{CDCl}_3$ , 100.6 MHz)  $\delta$  10.4 (s,  $\text{CH}_3$ ), 63.6 (d,  $J_{\text{C-P}} = 29.5$  Hz,  $\text{C}_\text{I}$ ), 112.3, 115.5, 119.4, 119.8, 120.1, 136.6 (indole-C), 127.1 (*ipso*-C), 129-133 (phenyl C). MS (FAB,  $m/z$ ): 890 ( $\text{M}^+ - \text{BF}_4$ ).

**{Pt(PPh<sub>3</sub>)<sub>2</sub>[ $\eta^3$ -CH<sub>2</sub>C(4-Me<sub>2</sub>NC<sub>6</sub>H<sub>4</sub>)CH<sub>2</sub>]}(BF<sub>4</sub>) (4).** Refer to the preparation of **3a**. Complex **1** prepared from *trans*-Pt(Br)(PPh<sub>3</sub>)<sub>2</sub>( $\eta^1$ -CHCCH<sub>2</sub>) (300 mg, 0.358 mmol) and AgBF<sub>4</sub> (78 mg, 0.401 mmol) reacted with PhNMe<sub>2</sub> (866 mg, 7.16 mmol) in CH<sub>2</sub>Cl<sub>2</sub> (15 mL) at 5 °C for 24 h gave **4** in 50% yield (173 mg).  $^{31}\text{P}$  NMR ( $\text{CDCl}_3$ , 121.5 MHz)  $\delta$  18.5 ( $J_{\text{P-Pt}} = 3799$  Hz);  $^1\text{H}$  NMR ( $\text{CDCl}_3$ , 300 MHz)  $\delta$  2.94 (2H, dd,  $J_{\text{H-H}} = 3.8$  Hz,  $J_{\text{H-P}} = 9.2$  Hz,  $J_{\text{H-Pt}} = 37.1$  Hz, anti-H), 3.10 (6H, s,  $\text{CH}_3$ ), 3.73 (2H, br, syn-H), 6.64 (2H, d,  $J_{\text{H-H}} = 8.8$  Hz, *o*-phenyl), 7.0-7.4 (32H, m, phenyl & *o*-aryl H);  $^{13}\text{C}$  NMR ( $\text{CDCl}_3$ , 100.6 MHz)  $\delta$  40.1 (s,  $\text{CH}_3$ ), 61.6 (d,  $J_{\text{C-P}} = 30.4$  Hz,  $\text{C}_\text{I}$ ), 111.6 (*o*-aryl C), 120.7 (*ipso*-C), 128-134 (phenyl C), 152.5 ( $\text{NC}$ ); MS (FAB,  $m/z$ ) 854 ( $\text{M}^+ - \text{BF}_4$ ). Anal. Calcd for PtC<sub>47</sub>H<sub>44</sub>NP<sub>2</sub>BF<sub>4</sub>·0.5CH<sub>2</sub>Cl<sub>2</sub>: C, 56.46; H, 4.46; N, 1.39. Found : C, 56.87; H, 4.44; N, 1.23.

**{Pt(PPh<sub>3</sub>)<sub>2</sub>[ $\eta^3$ -CH<sub>2</sub>C(2,4-(MeO)<sub>2</sub>C<sub>6</sub>H<sub>3</sub>)CH<sub>2</sub>]}(BF<sub>4</sub>) (5).** Refer to the preparation of **3a**. Complex **1** prepared from *trans*-Pt(Br)(PPh<sub>3</sub>)<sub>2</sub>( $\eta^1$ -CHCCH<sub>2</sub>) (300 mg, 0.358 mmol) and AgBF<sub>4</sub> (78 mg, 0.401 mmol) reacted with 1,3-(MeO)<sub>2</sub>C<sub>6</sub>H<sub>4</sub> (1 mL, 7.25 mmol) in CH<sub>2</sub>Cl<sub>2</sub> (15 mL) at 5 °C for 3 days gave **5** in 83% yield (292 mg).  $^{31}\text{P}$  NMR ( $\text{CDCl}_3$ , 121.5 MHz)  $\delta$  19.2 ( $J_{\text{P-Pt}} = 3875$  Hz);  $^1\text{H}$  NMR ( $\text{CDCl}_3$ , 300 MHz)  $\delta$  3.07 (2H, d,  $J_{\text{H-P}} = 8.3$  Hz,  $J_{\text{H-Pt}} = 39.3$  Hz, anti-H), 3.49 (3H, s,  $\text{OCH}_3$ ), 3.91 (3H, s,  $\text{OCH}_3$ ), 4.03 (2H, br, syn-H), 6.45 (1H, dd,  $J_{\text{H-H}} = 1.9, 8.7$  Hz, *m*-CH), 6.54 (1H, d,  $J_{\text{H-H}} = 1.9$  Hz, *m*-CH), 7.0-7.4 (31H, m, phenyl & *o*-aryl H);  $^{13}\text{C}$  NMR ( $\text{CDCl}_3$ , 100.6 MHz)  $\delta$  55.6, 55.9 (s, s,  $\text{OCH}_3$ ), 66.8 (dd,  $J_{\text{C-P}} = 3.8, 32.6$  Hz,  $J_{\text{C-Pt}} = 85.0$  Hz,  $\text{C}_\text{I}$ ), 98.8, 105.8 (s, s, *m*-CH), 115.6 (s, *ipso*-C), 133.9 (s,  $\text{C}_\text{C}$ ), 129-134

(phosphino phenyl C), 159.3 ( $J_{C-Pt} = 16.7$  Hz, *o*-C), 163.3 ( $J_{C-Pt} = 9.1$  Hz, *p*-C). MS (FAB,  $m/z$ ): 896 ( $M^+ - BF_4$ ).

**{Pt(PPh<sub>3</sub>)<sub>2</sub>[ $\eta^3$ -CH<sub>2</sub>C(2,4,6-(MeO)<sub>3</sub>C<sub>6</sub>H<sub>2</sub>)CH<sub>2</sub>]}(BF<sub>4</sub>) (6).** Refer to the preparation of **3a**. Complex **1** prepared from *trans*-Pt(Br)(PPh<sub>3</sub>)<sub>2</sub>( $\eta^1$ -CHCCH<sub>2</sub>) (300 mg, 0.358 mmol) and AgBF<sub>4</sub> (78 mg, 0.401 mmol) reacted with 1,3,5-(MeO)<sub>3</sub>C<sub>6</sub>H<sub>3</sub> (1.2 g, 7.15 mmol) in CH<sub>2</sub>Cl<sub>2</sub> (15 mL) at 5 °C for 24 h gave **6** in 84% yield (305 mg). <sup>31</sup>P NMR (CDCl<sub>3</sub>, 121.5 MHz)  $\delta$  19.1 ( $J_{P-Pt} = 3912$  Hz); <sup>1</sup>H NMR (CDCl<sub>3</sub>, 300 MHz)  $\delta$  3.12 (2H, d,  $J_{H-P} = 8.3$  Hz,  $J_{H-Pt} = 40.7$  Hz, anti-H), 3.47 (6H, s, *o*-OCH<sub>3</sub>), 3.92 (3H, s, *p*-OCH<sub>3</sub>), 4.08 (2H, br, syn-H), 6.19 (2H, s, *m*-CH), 7.1-7.3 (30H, m, phenyl H); <sup>13</sup>C NMR (CDCl<sub>3</sub>, 100.6 MHz)  $\delta$  55.8, 56.0 (s, s, OCH<sub>3</sub>), 69.7 (d,  $J_{C-P} = 29.6$  Hz,  $J_{C-Pt} = 89.5$  Hz, C<sub>1</sub>), 91.1 (s, *m*-C), 104.1 ( $J_{C-Pt} = 17.5$  Hz, *ipso*-C), 133 (s, C<sub>C</sub>), 129-134 (phosphino phenyl C), 160.1 ( $J_{C-Pt} = 19.0$  Hz, *o*-C), 163.0 (s, *p*-C). MS (FAB,  $m/z$ ): 927 ( $M^+ - BF_4$ ).

**2-(2',4',6'-trimethoxyphenyl)propene**

**CH<sub>2</sub>=C[2',4',6'-(MeO)<sub>3</sub>C<sub>6</sub>H<sub>2</sub>]CH<sub>3</sub> (7a).**

Compound **7a** was resulted from the reaction of **6** (30 mg, 0.03 mmol) and Bu<sub>4</sub>NBH<sub>4</sub> (15 mg, 0.06 mmol) in CDCl<sub>3</sub> for 1 day. The yield was 60% based on the NMR data. <sup>1</sup>H NMR (CDCl<sub>3</sub>, 300 MHz)  $\delta$  1.99 (3H, dd,  $J_{H-H} = 0.7, 1.4$  Hz, CH<sub>3</sub>), 3.81 (3H, s, OCH<sub>3</sub>), 3.87 (6H, s, OCH<sub>3</sub>), 4.84 (1H, dt,  $J_{H-H} = 0.7, 2.5$  Hz, =CH<sub>2</sub>), 5.30 (1H, dt,  $J_{H-H} = 1.4, 2.5$  Hz, =CH<sub>2</sub>), 6.15 (2H, *m*-CH); <sup>13</sup>C NMR (CDCl<sub>3</sub>, 100.6 MHz)  $\delta$  23.7 (CH<sub>3</sub>), 55.3, 55.9 (OCH<sub>3</sub>), 90.8 (*m*-C), 116.0 (=CH<sub>2</sub>), 139.1 (Ar-C), 157.8 (*o*-C), 160.0 (*p*-C); HRMS: calcd for C<sub>12</sub>H<sub>16</sub>O<sub>3</sub>S ( $M^+$ ) 208.1099, found 208.1090.

**(3-phenylthio)-2-(2',4',6'-trimethoxyphenyl)-propene**

**CH<sub>2</sub>=C[2',4',6'-(MeO)<sub>3</sub>C<sub>6</sub>H<sub>2</sub>]CH<sub>2</sub>(SPh) (7b).**

Compound **7c** was resulted from the reaction of **6** (30 mg, 0.03 mmol) and NaSPh (12 mg, 0.09 mmol) in CDCl<sub>3</sub> for 3 days. The yield was 58% based on the NMR data. <sup>1</sup>H NMR (CDCl<sub>3</sub>, 300 MHz)  $\delta$  3.73 (6H, s, OCH<sub>3</sub>), 3.80 (3H,

s, OCH<sub>3</sub>), 3.83 (2H, dd,  $J_{\text{H-H}} = 0.9, 1.4$  Hz, CH<sub>2</sub>), 5.05 (1H, dt,  $J_{\text{H-H}} = 0.9, 1.7$  Hz, =CH<sub>2</sub>), 5.57 (1H, dt,  $J_{\text{H-H}} = 1.4, 1.7$  Hz, =CH<sub>2</sub>), 6.12 (2H, *m*-CH); <sup>13</sup>C NMR (CDCl<sub>3</sub>, 100.6 MHz) δ 39.6 (CH<sub>2</sub>), 55.3, 55.7 (OCH<sub>3</sub>), 90.7 (*m*-C), 118.2 (=CH<sub>2</sub>), 137.7 (Ar-C), 158.4 (*o*-C), 160.5 (*p*-C); HRMS: calcd for C<sub>18</sub>H<sub>20</sub>O<sub>3</sub>S (M<sup>+</sup>) 316.1133, found 316.1136.

**4,4-bis(phenylsulfonyl)-2-(2',4',6'-trimethoxyphenyl)-1-butene**  
**CH<sub>2</sub>=C[2',4',6'-(MeO)<sub>3</sub>C<sub>6</sub>H<sub>2</sub>]CH<sub>2</sub>CH(SO<sub>2</sub>Ph)<sub>2</sub> (7c).**

Refer to the preparation of 7b. The yield was 34% based on the NMR data. <sup>1</sup>H NMR (CDCl<sub>3</sub>, 300 MHz) δ 3.20 (2H, d,  $J_{\text{H-H}} = 4.5$  Hz, CH<sub>2</sub>), 3.67 (6H, s, OCH<sub>3</sub>), 3.79 (3H, s, OCH<sub>3</sub>), 4.53 (1H, t,  $J_{\text{H-H}} = 4.5$  Hz, CH), 4.86, 5.20 (1H, 1H, d, d,  $J_{\text{H-H}} = 1.2$  Hz, =CH<sub>2</sub>), 5.98 (2H, *m*-CH); <sup>13</sup>C NMR (CDCl<sub>3</sub>, 100.6 MHz) δ 29.7 (CH<sub>2</sub>), 55.3, 55.7 (OCH<sub>3</sub>), 80.0 (CH), 90.7 (*m*-C), 113.5 (=CH<sub>2</sub>), 120.3 (*ipso*-C), 138.6 (Ar-C), 158.2 (*o*-C), 160.8 (*p*-C); HRMS: calcd for C<sub>25</sub>H<sub>26</sub>O<sub>7</sub>S<sub>2</sub> (M<sup>+</sup>) 502.1120, found 502.1087.

**Crossover Labeling Experiment.**

Complex 1 prepared from the reaction of *trans*-Pt(PPh<sub>3</sub>)<sub>2</sub>(η<sup>1</sup>-C<sub>3</sub>H<sub>3</sub>)(Br) (100 mg, 0.119 mmol) and AgBF<sub>4</sub> (26 mg, 0.13 mmol) in CH<sub>2</sub>Cl<sub>2</sub> at -20 °C, reacted with a mixture of 1,3,5-(MeO)<sub>3</sub>C<sub>6</sub>H<sub>3</sub> (200 mg, 1.19 mmol) and 1,3,5-(MeO)<sub>3</sub>C<sub>6</sub>D<sub>3</sub>/-1,3,5-(MeO)<sub>3</sub>C<sub>6</sub>D<sub>2</sub>H (d<sub>3</sub>:d<sub>2</sub> = 78:22, 204 mg, 1.19 mmol) at 5 °C for 1 day. The deuterium-labeled complex 6' was precipitated by adding diethylether to the concentrated reaction solution. The integrations of the <sup>1</sup>H NMR resonances for 6' are: δ 3.12 (2H, 7.05), δ 3.47 (6H, 23.8), δ 3.92 (3H, 10.8), δ 4.08 (2H, 6.92), δ 6.19 (2H, 4.01).

The reaction of 6' (50 mg, 0.05 mmol) and NaSPh (20 mg, 0.15 mmol) was stirred in CDCl<sub>3</sub> at 25 °C for 3 days to gave deuterated products of 7b. In the <sup>1</sup>H NMR spectra, the deuterium was found at δ 3.83, 5.05, 5.57, and

6.12. The HRMS showed the relative intensities for M(316.1141):M+1-(317.1196):M+2(318.1264):M+3(319.1307) = 24:31:34:12. **7b** contains 18 carbon atoms. The data is then calibrated with the  $^{13}\text{C}$  abundance. The ratio of M:M+1:M+2:M+3 becomes 28:31:34:7. The starting labeling ratio for 1,3,5-trimethoxybenzene is  $d_0:d_2:d_3 = 50:11:39$ . The labeling ratio would be exactly the same, if the reaction of **1** and arene underwent an intramolecular process. Without considering the primary isotope effect, the data with full deuterium scrambling could be calculated.

$$d_0 = (50)(11/3 + 50) = 26.8$$

$$d_1 = (50)(11 \times 2/3 + 39) + (11 \times 3 + 50)(11 \times 2/3) = 27.1$$

$$d_2 = (39 + 11 \times 2/3)(11 \times 2/3) + (11/3 + 50)(11/3 + 39) = 26.3$$

$$d_3 = (39 + 11/3)(11 \times 2/3 + 39) = 19.8$$

These experimental data match with an intermolecular process.
